# Supplementary figures and images for: Acetate intercalated Mg–Al layered double hydroxides (LDHs) through modified amide hydrolysis: a new route to synthesize novel mixed metal oxides (MMOs) for CO2capture
Source: Royal Society of Chemistry journal article supplement (doi:10.1039/d1dt00602a), 2021-01-01

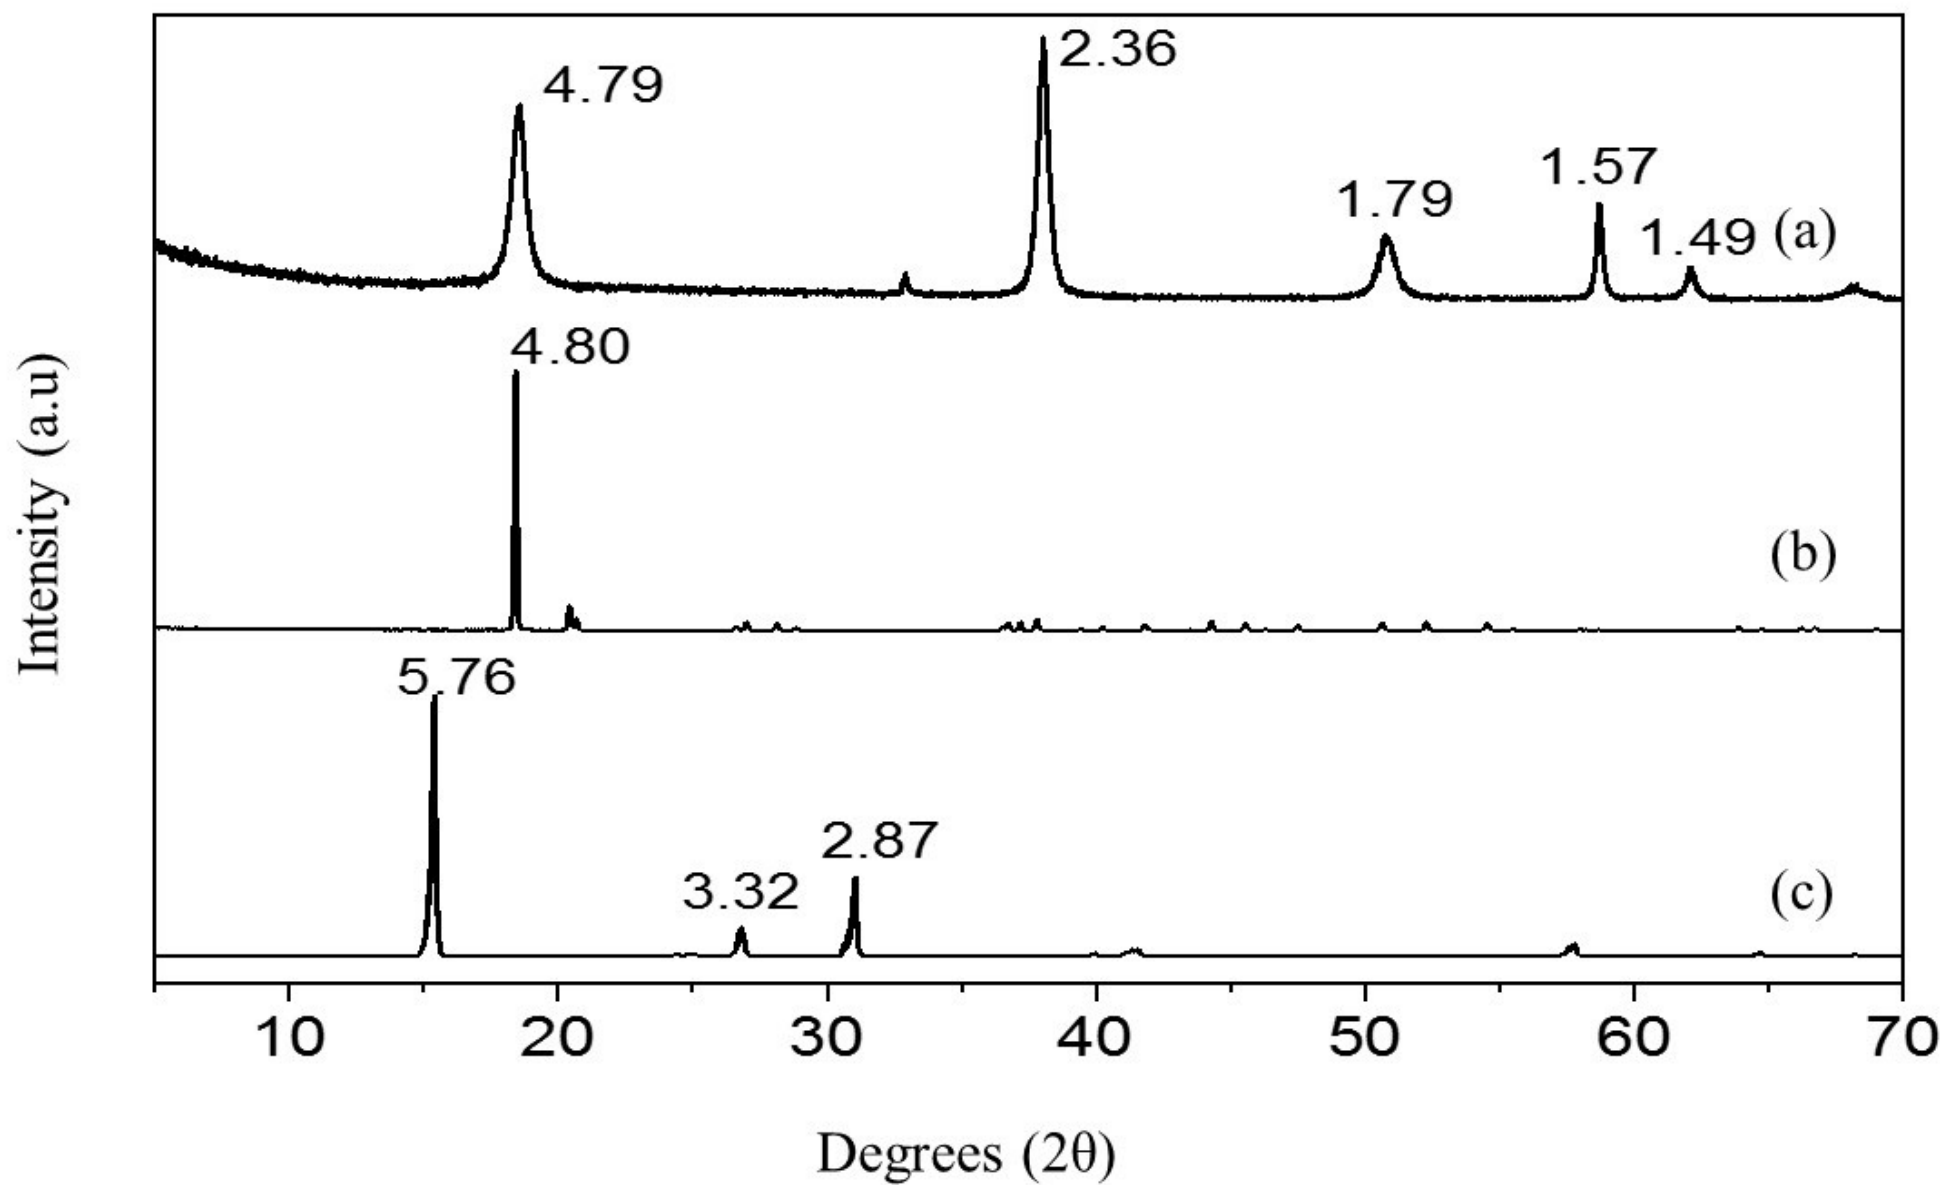

Supplement: d1dt00602a2.pdf [file d1dt00602a2.pdf]

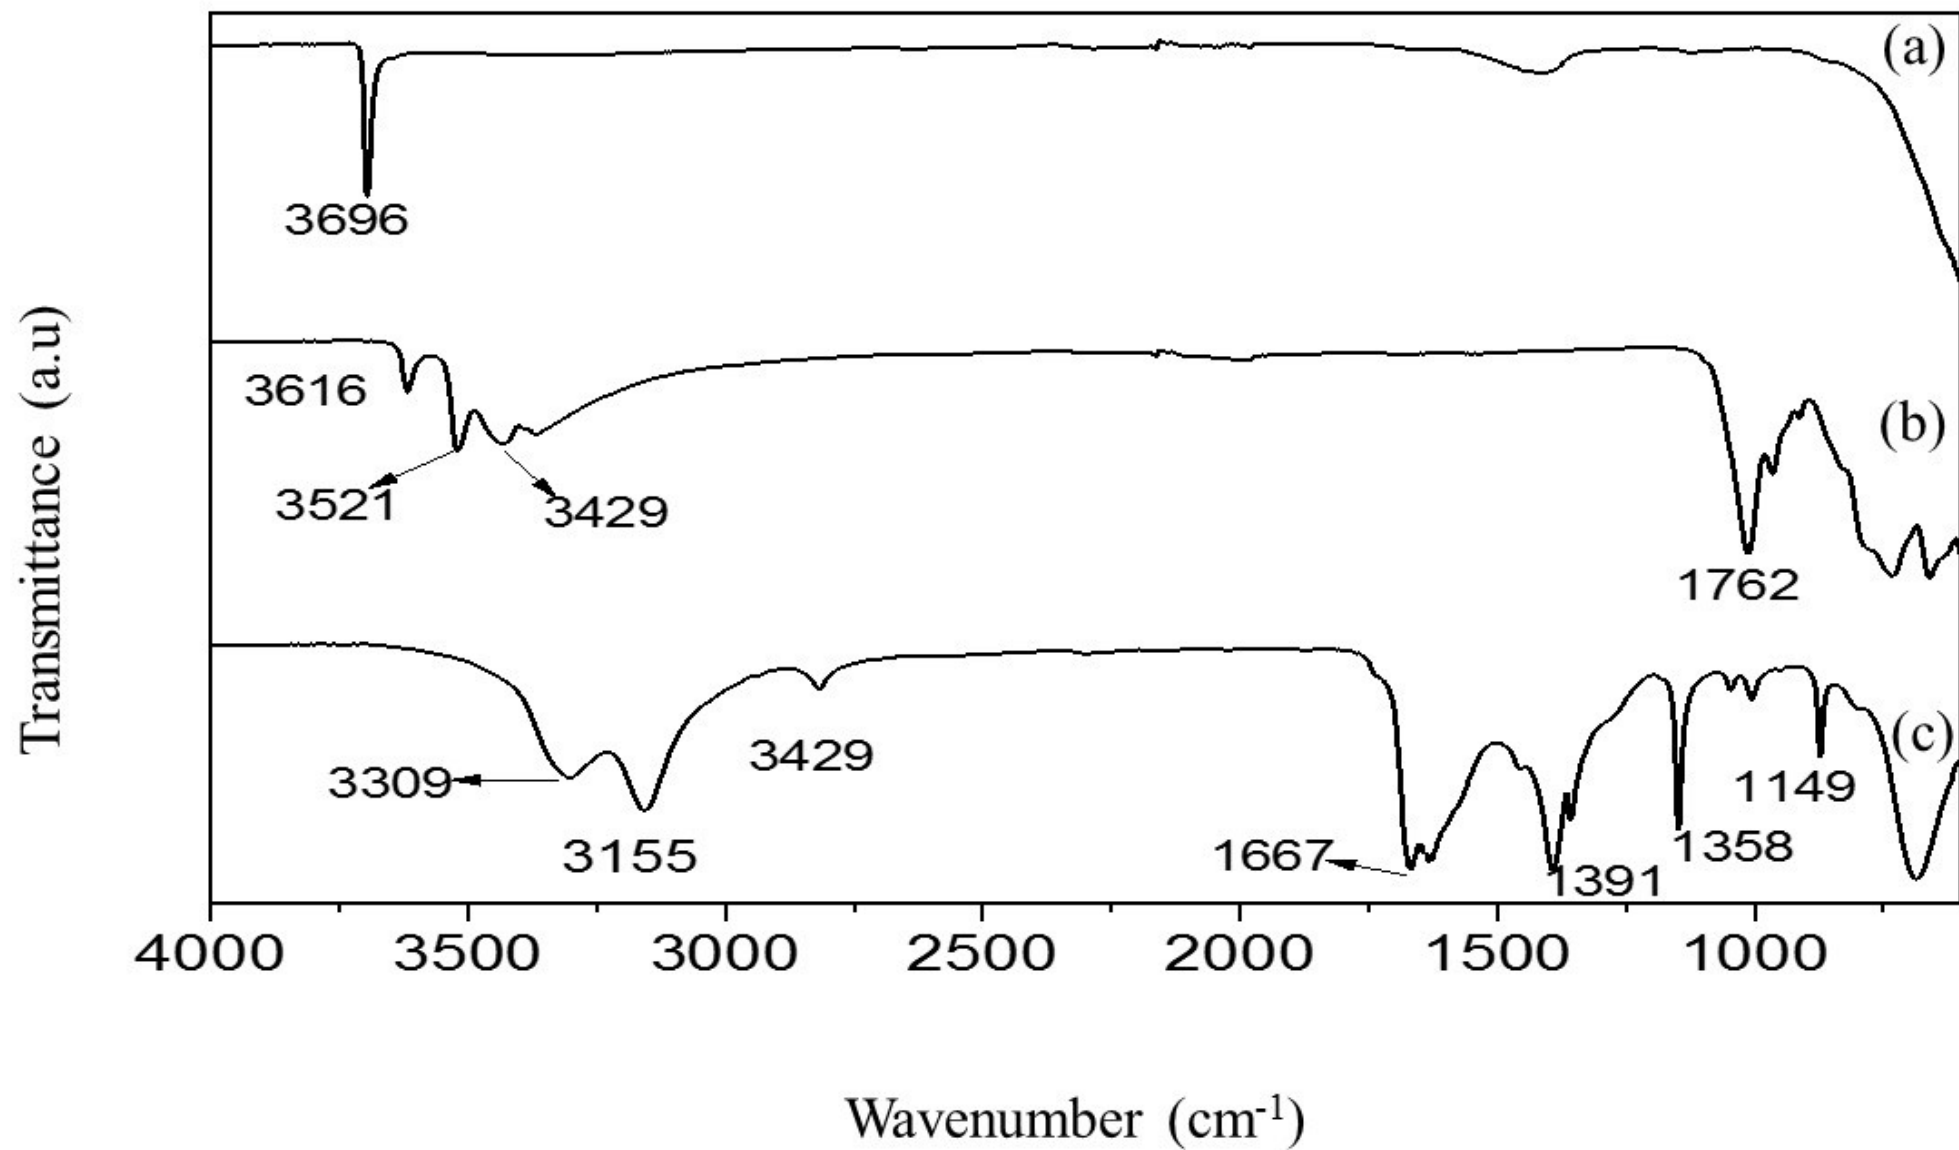

Supplement: d1dt00602a3.pdf [file d1dt00602a3.pdf]

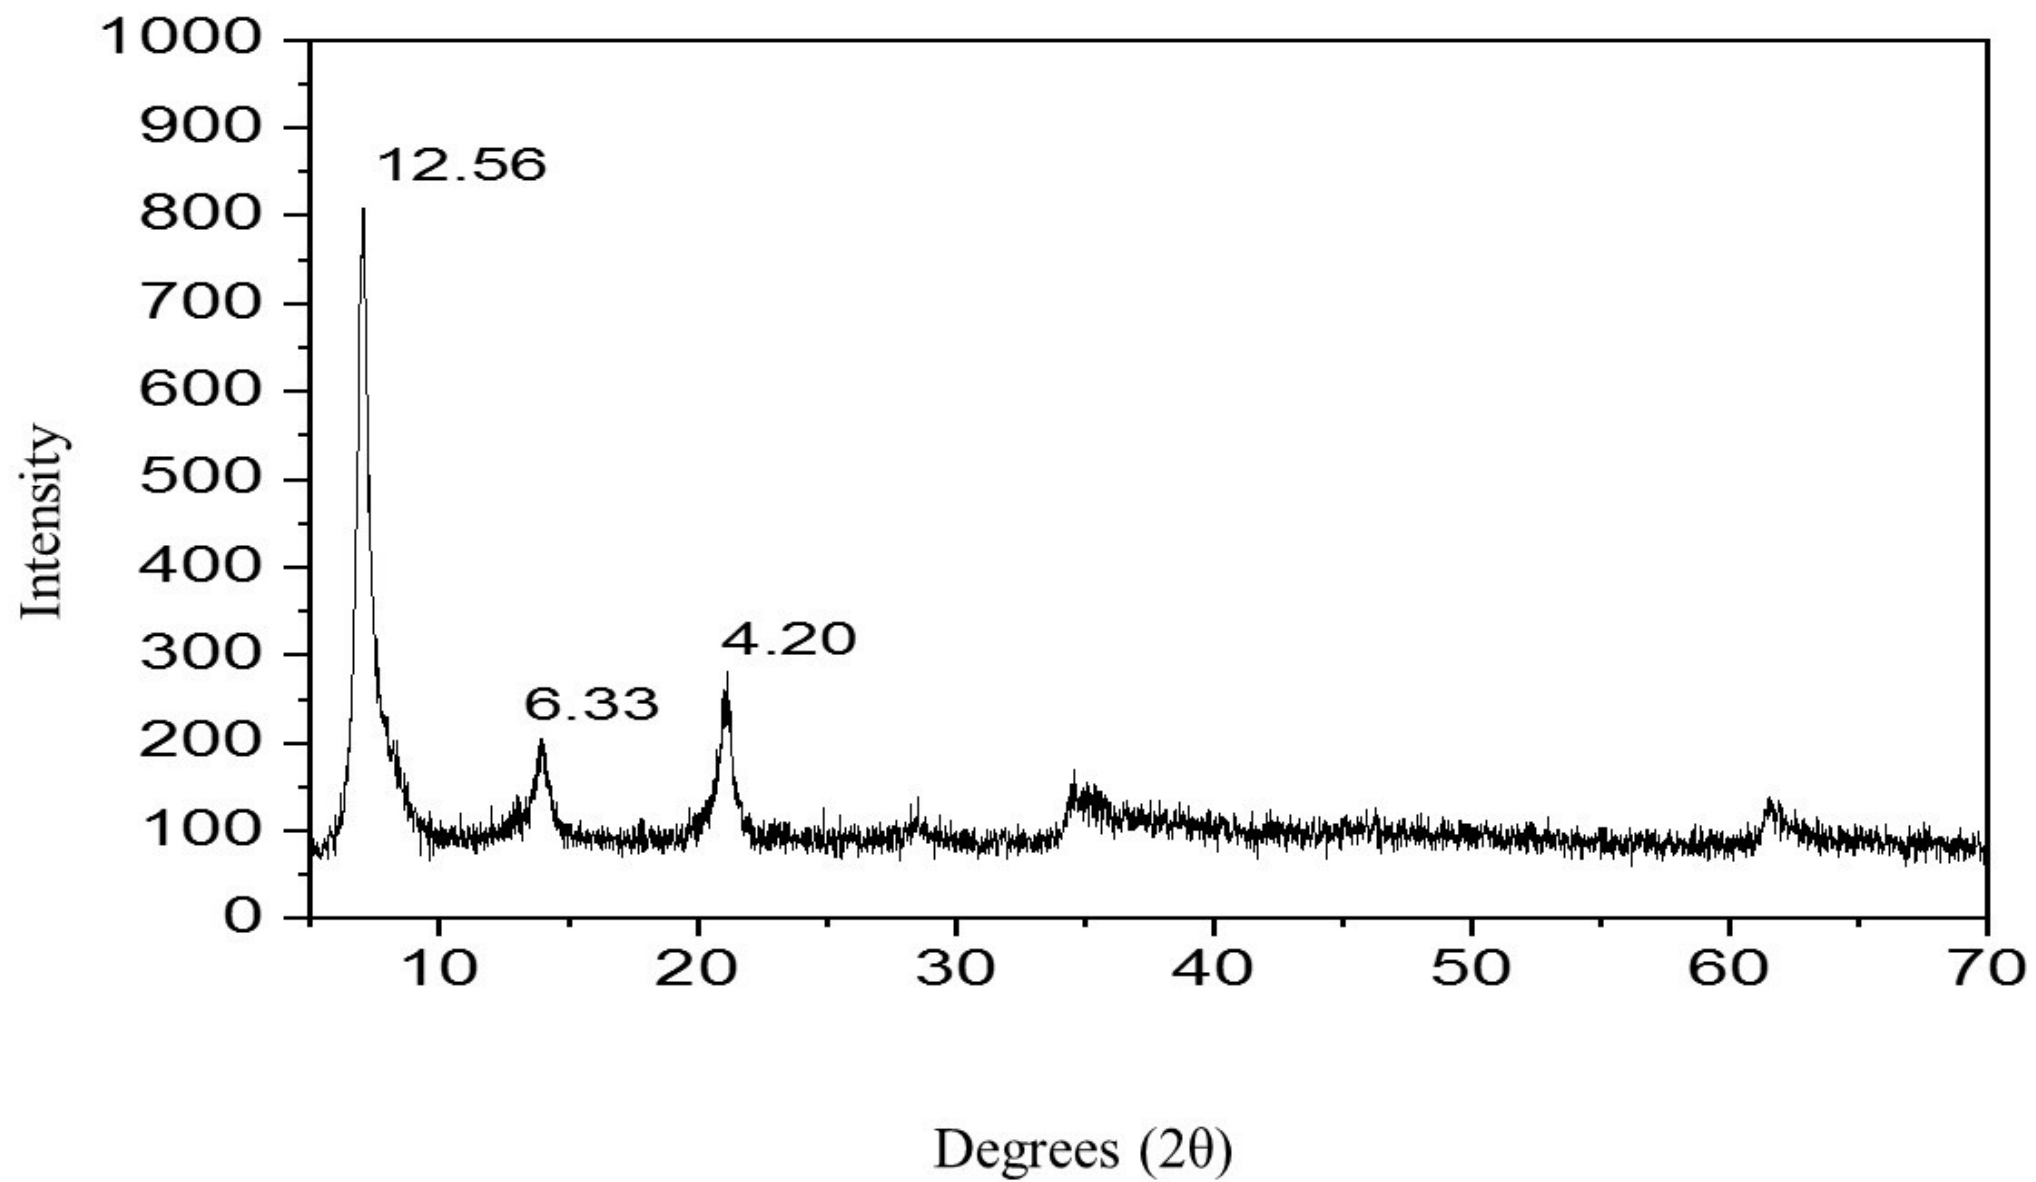

Supplement: d1dt00602a4.pdf [file d1dt00602a4.pdf]

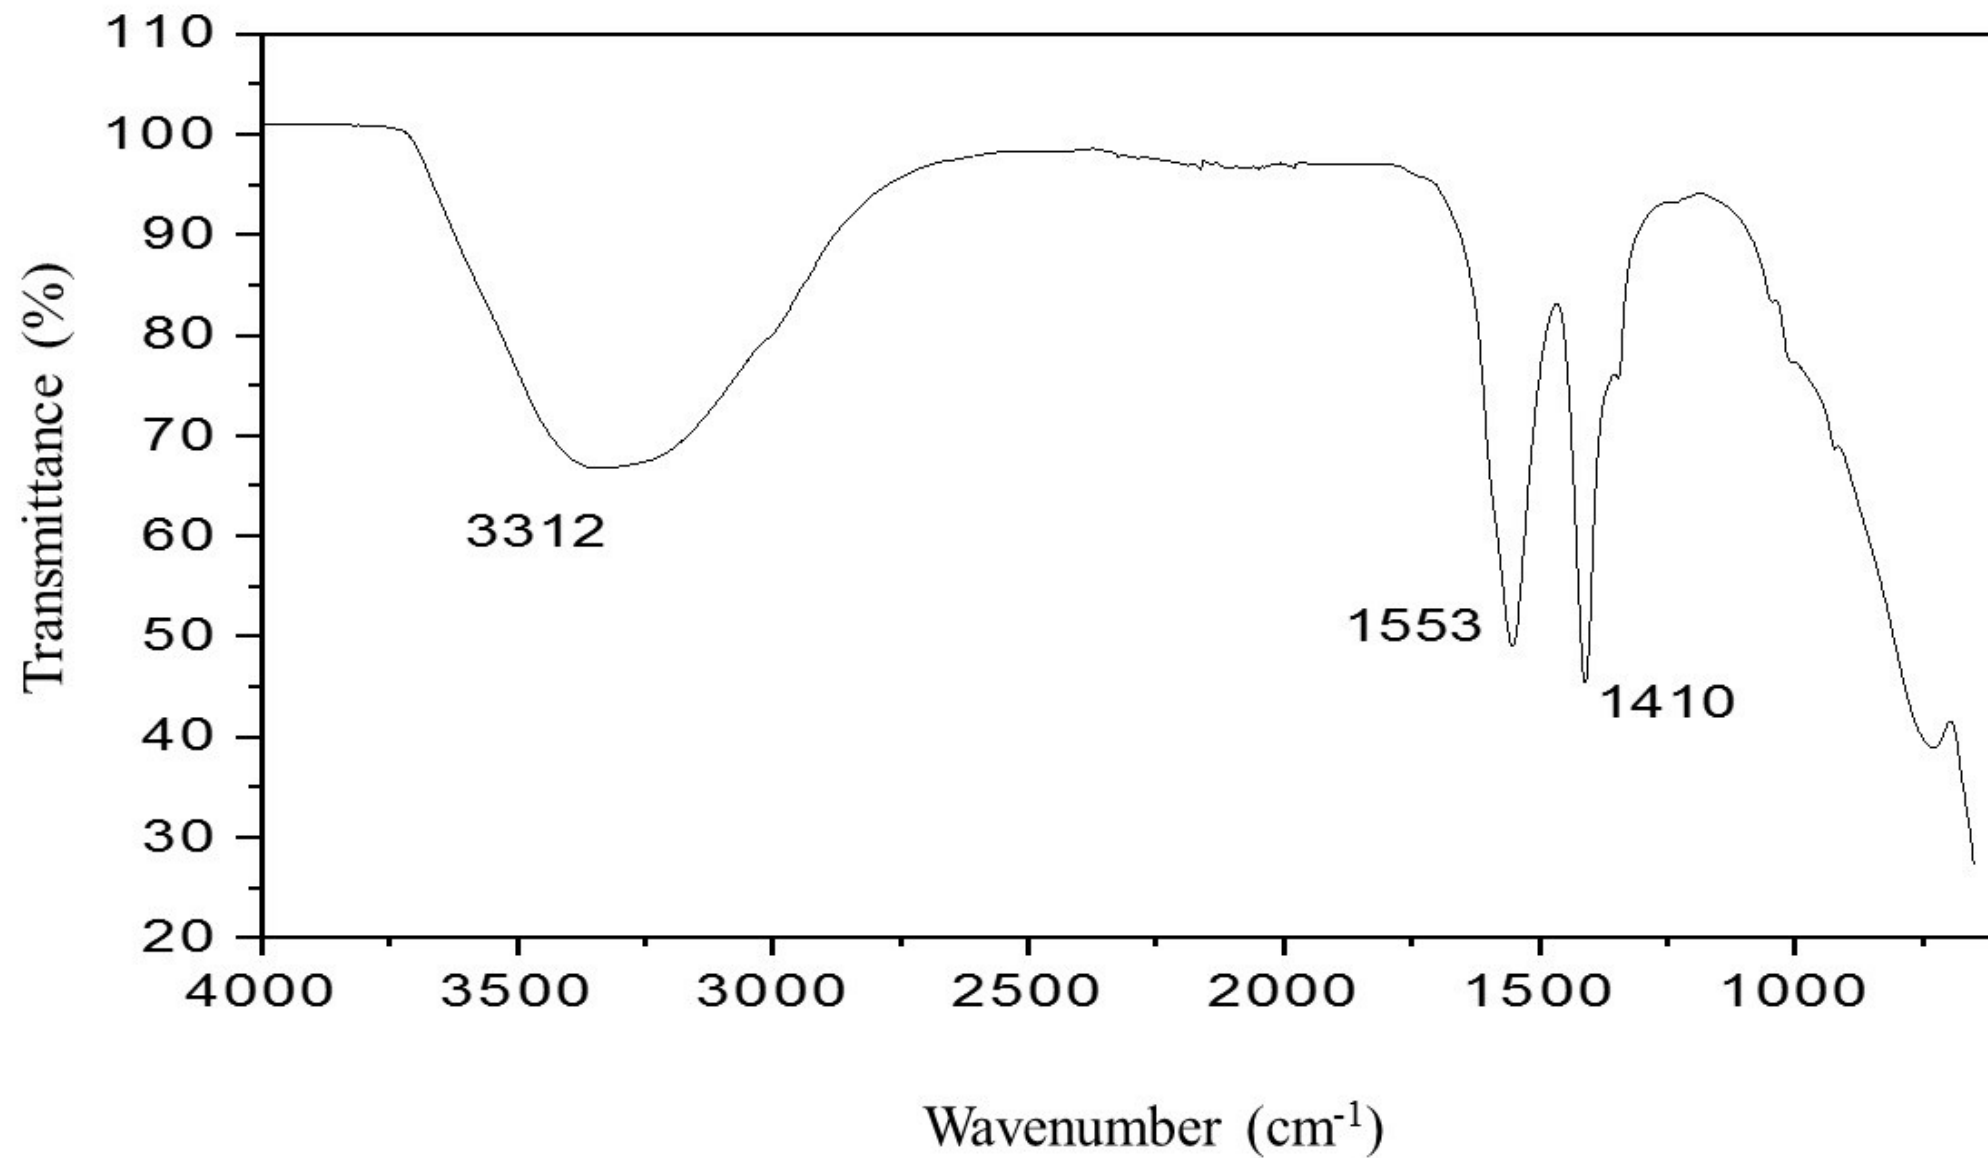

Supplement: d1dt00602a5.pdf [file d1dt00602a5.pdf]

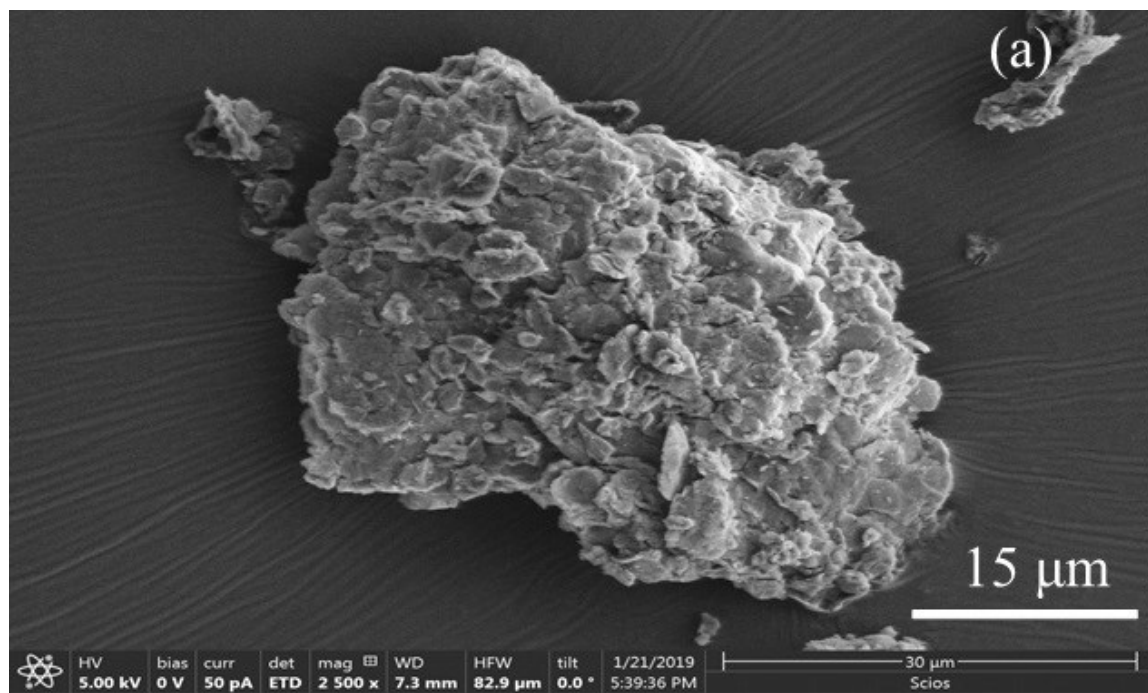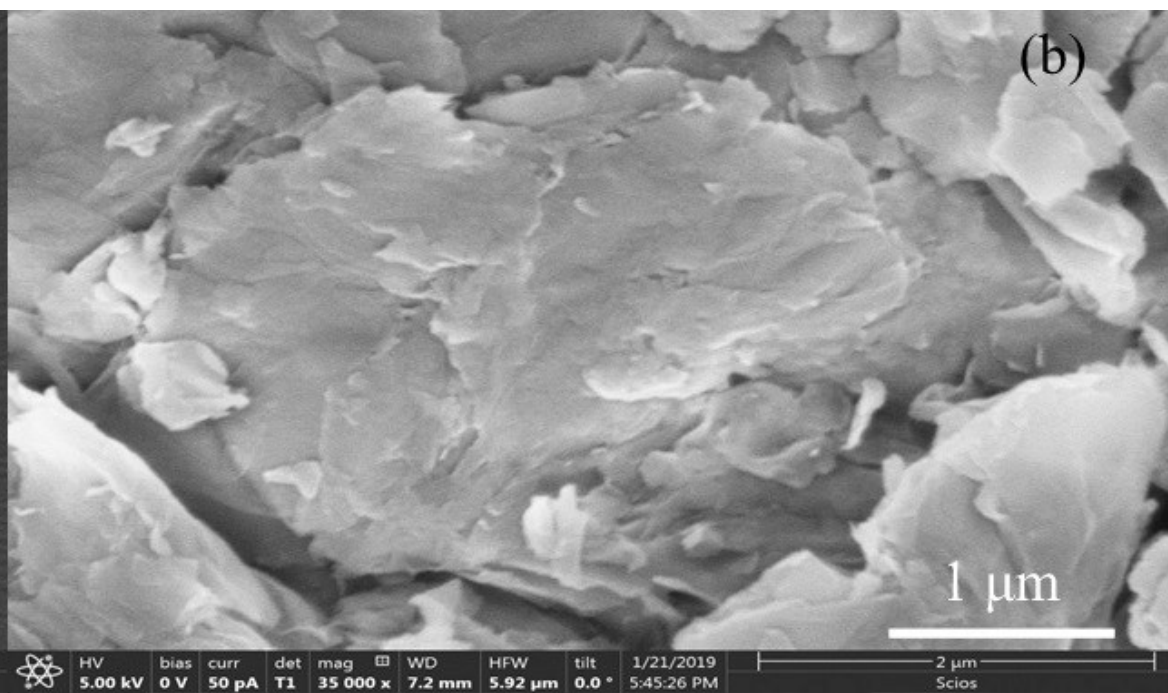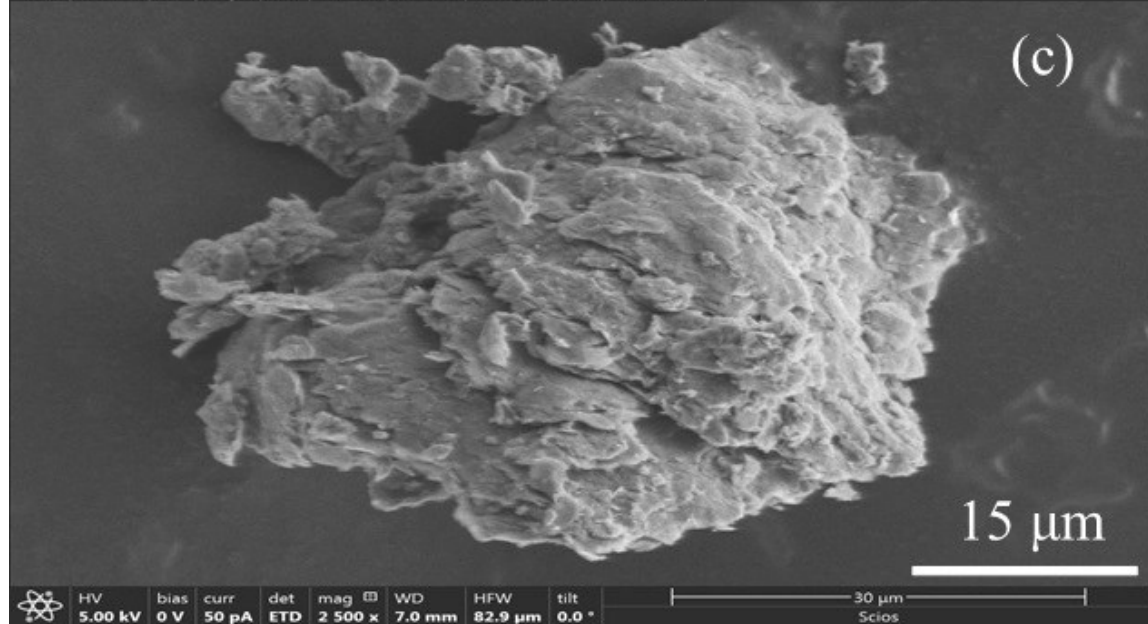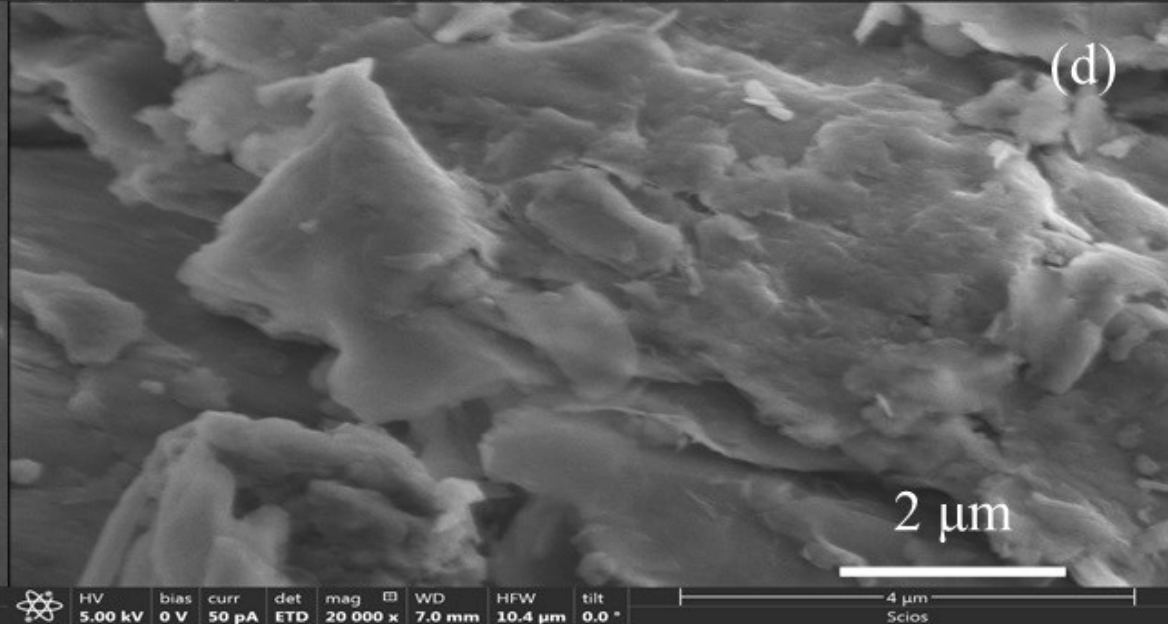

Supplement: d1dt00602a6.pdf [file d1dt00602a6.pdf]

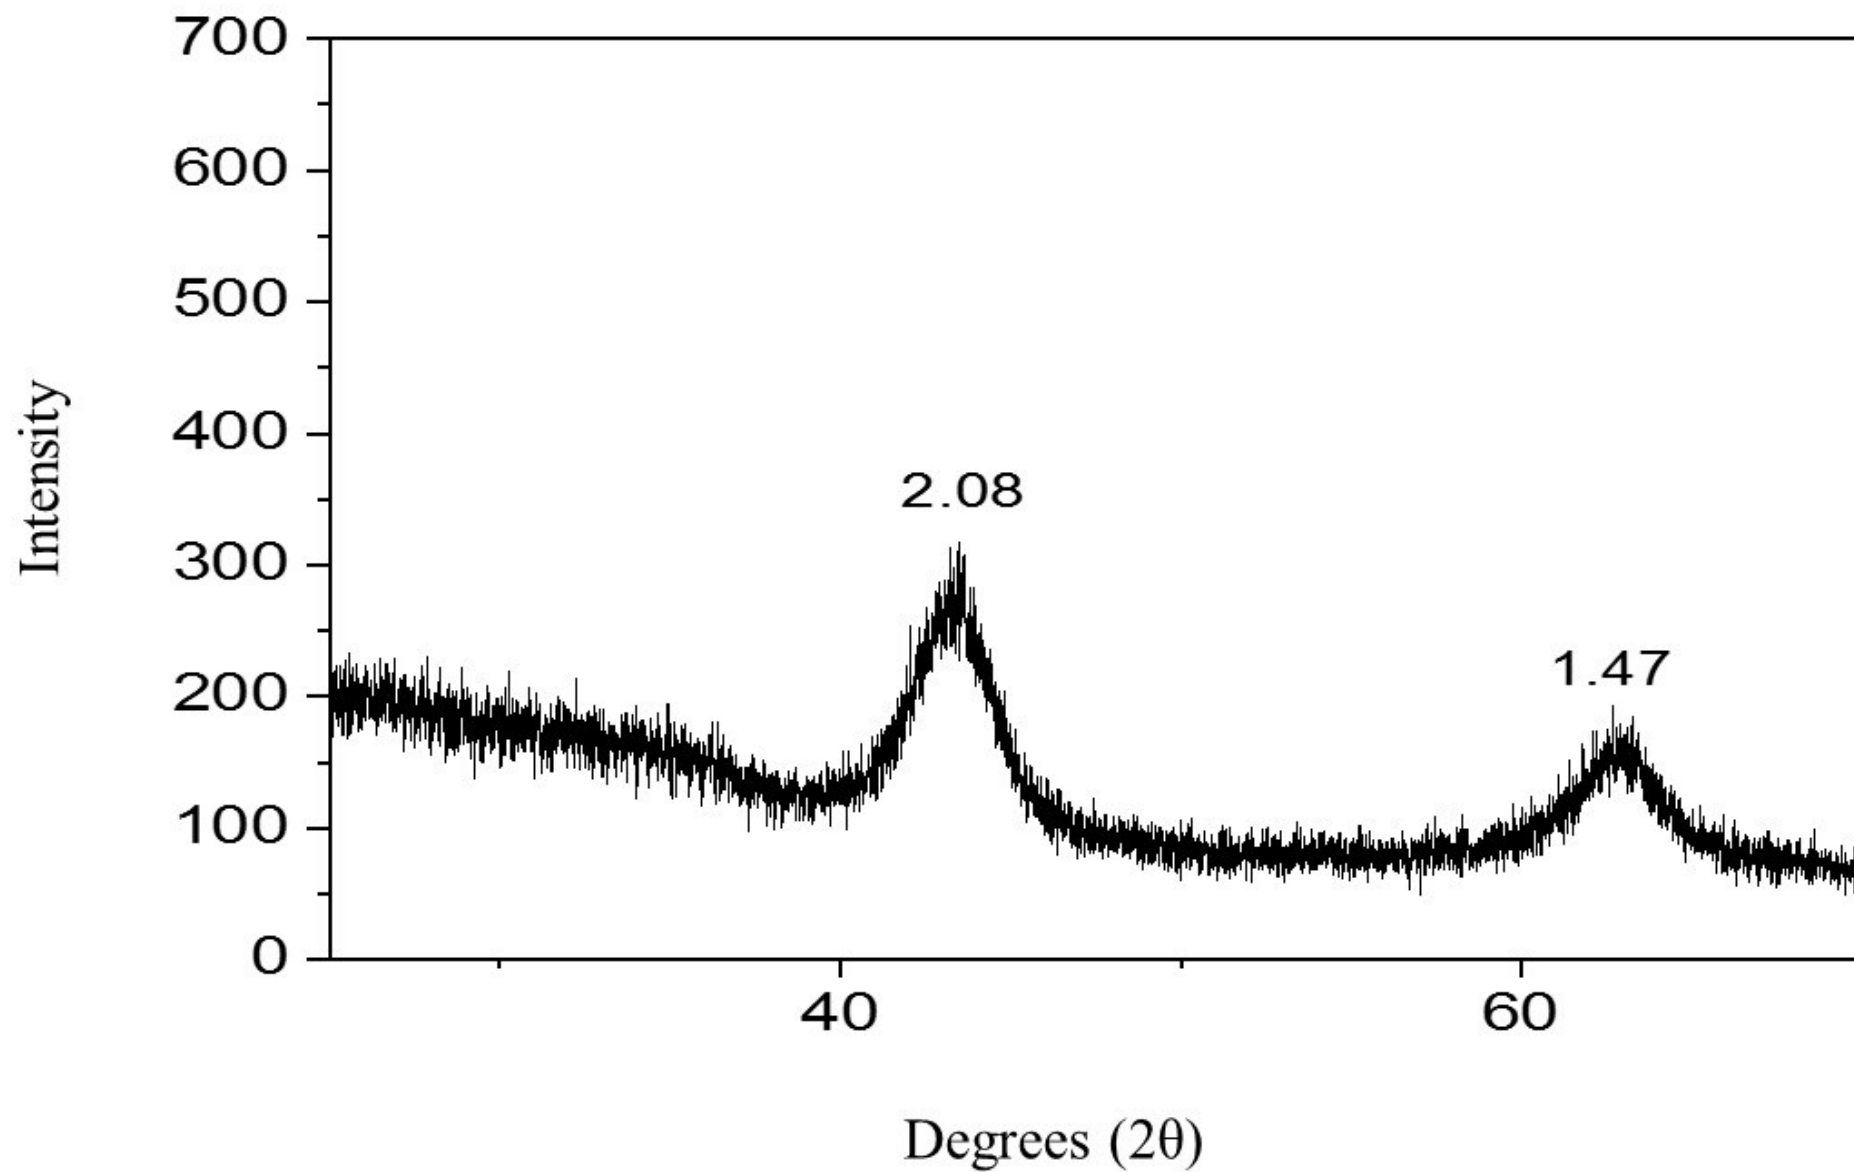

Supplement: d1dt00602a7.pdf [file d1dt00602a7.pdf]
